# Supplementary material for: Sports Activity with Ankle Osteoarthritis and Total Ankle Arthroplasty
Source: Preprints.org preprint supplement (doi:10.20944/preprints202411.0097.v1), 2024-11-01
Supplement: Supplementary file 1 [file supplementary]

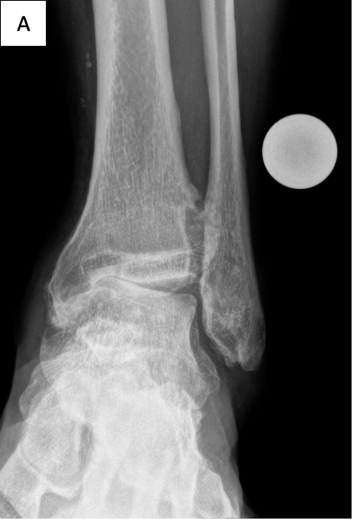

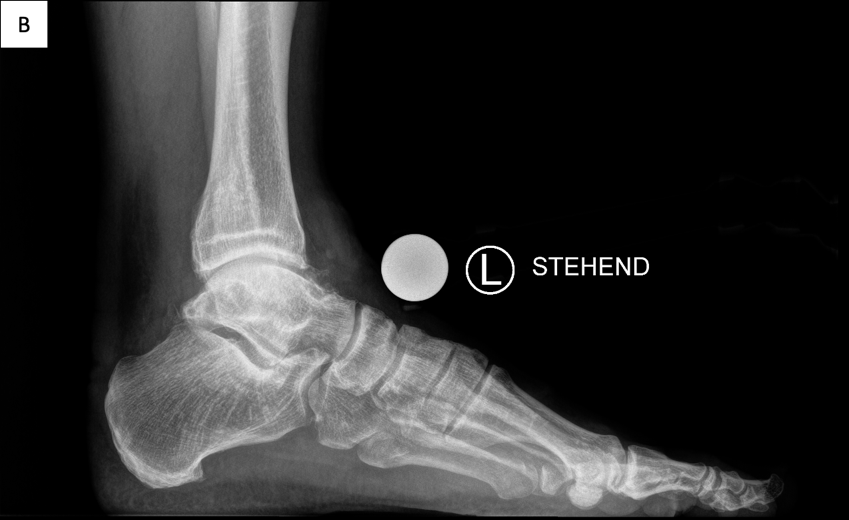

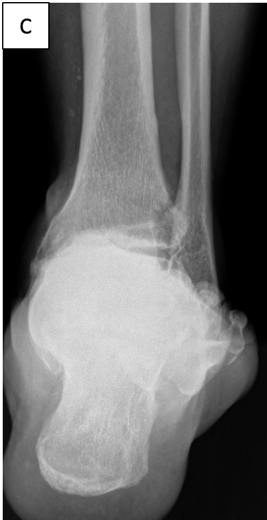


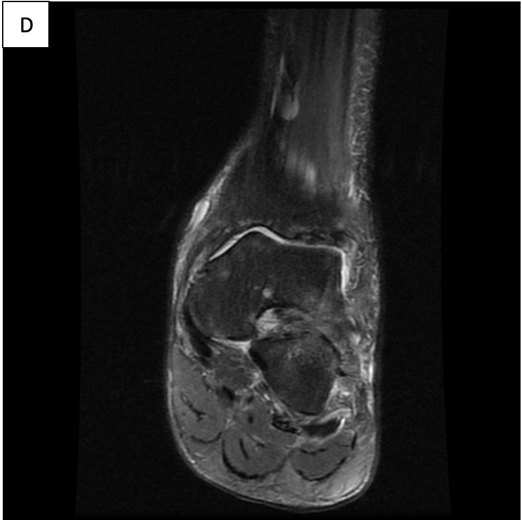

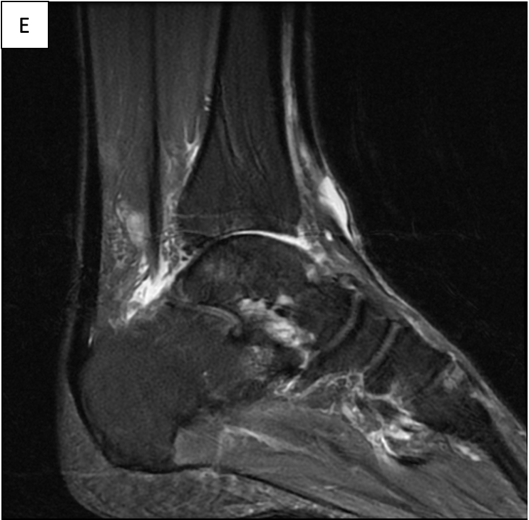

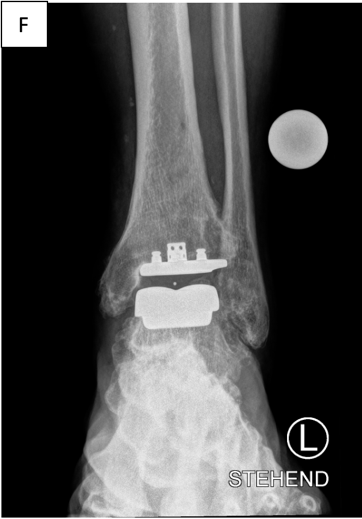

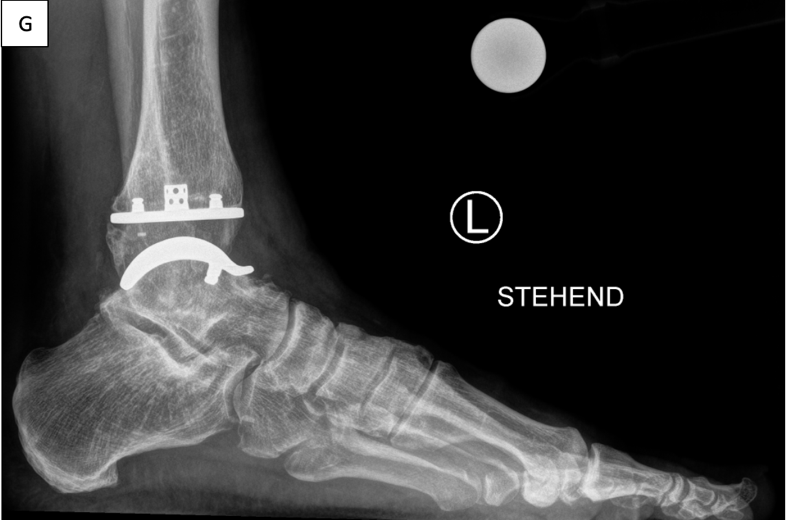

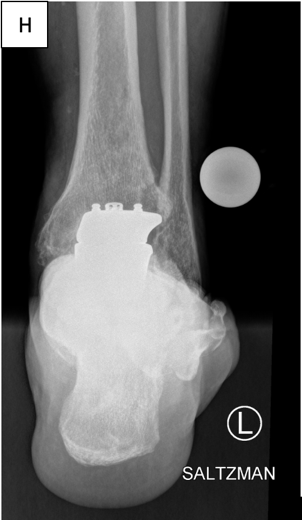


**Fig. 1 Sports Active Patient with Total Ankle Arthroplasty VANTAGE Total Ankle Arthroplasty Mobile Bearing.** A 59-year-old hiker suffered from post-traumatic end-stage ankle OA (A, B, C, pre-op). MR images show asymmetric OA (D, E, pre-op) After TAA surgery (F, G, H, 3 years follow-up), he could return to a sport level > 5h/week.
